# Supplementary material
Source: PubMed Central journal article supplement (PMC2062484)
Supplement: NIHMS24654-supplement-s2table.pdf [file NIHMS24654-supplement-s2table.pdf]

**Table S2 | A summary of neural functions that are regulated by purinergic signalling.**

| <b>Function</b>                                                                                                                                                                                                                 | <b>Reference</b>                                                                     |
|---------------------------------------------------------------------------------------------------------------------------------------------------------------------------------------------------------------------------------|--------------------------------------------------------------------------------------|
| <b>Calcium signalling</b><br>astrocytes<br>Schwann cells<br>terminal (perisynaptic) Schwann cells<br>oligodendrocytes<br>optic nerve glia<br>microglia                                                                          | 1–10<br>11–13<br>14–16<br>17–18<br>19<br>10, 20–24                                   |
| <b>Synaptic transmission</b><br>sensory neurons<br>motor neurons<br>inhibitory interneurons<br>CNS<br>hippocampus<br>retina<br>neuromuscular junction<br>stimulate neurotransmitter release<br>inhibit neurotransmitter release | 25, 26<br>27, 28<br>29<br>30<br>31–33<br>34, 35<br>36, 37<br>38–42<br>31, 33, 43, 44 |
| <b>Synaptic plasticity</b><br>Long-term potentiation<br>Long-term depression<br>hypothalamic synapses<br>neuromuscular junction<br>hippocampus                                                                                  | 40, 45–48<br>45, 49<br>50<br>14, 51<br>31, 33, 43, 44                                |
| <b>Glial regulation of synaptic transmission</b><br>hippocampus<br>retina<br>hypothalamus<br>neuromuscular junction                                                                                                             | 45, 49<br>34, 35<br>50<br>14, 51, 52                                                 |
| <b>Muscle contraction</b><br>heart and blood vessel<br>gut and bladder<br>vas deferens<br>skeletal muscle<br>glial vascular interface                                                                                           | 53<br>54, 27<br>55<br>37<br>56–58                                                    |
| <b>Release of bioactive substances from glia</b><br>excitatory neurotransmitters<br>inhibitory neurotransmitters<br>cytokines<br>growth factors<br>ATP and adenosine                                                            | 59<br>60<br>61–65<br>66<br>8, 40, 45, 67–73                                          |
| <b>Nervous system development</b><br>cell proliferation<br>adult neural stem cells                                                                                                                                              | 13, 18, 59, 74, 75<br>76                                                             |

|                                                                                                                                                                                                                                                                                       |                                                                                                            |
|---------------------------------------------------------------------------------------------------------------------------------------------------------------------------------------------------------------------------------------------------------------------------------------|------------------------------------------------------------------------------------------------------------|
| differentiation<br>myelination<br>muscle development<br>growth factors and receptors                                                                                                                                                                                                  | 77, 78<br>13, 18, 62<br>79, 80<br>13, 75, 77, 78, 81–86                                                    |
| <b>Neuropathology</b><br>astrogliosis<br>apoptosis<br>ischemia and hypoxia (neural protection)<br>pain<br>brain microcirculation<br>inflammation<br>response to neurotrauma<br>cell morphology changes<br>cell migration and chemotaxis<br>anticonvulsive, anxiolytic, and depressant | 85, 87–89<br>90, 91 (reviews)<br>92 (review), 93<br>56, 57, 94<br>58<br>64, 65, 95<br>63<br>22<br>23<br>96 |
| <b>Nervous system disease</b><br>Parkinson's<br>Alzheimer's<br>epilepsy<br>migraine<br>cancer                                                                                                                                                                                         | 96, 97<br>98<br>99, 100<br>56<br>90, 91 (review)                                                           |
| <b>Non-neuronal cells and functions</b><br>immune, platelets, macrophages,<br>lymphocytes, mast cells, endocrine<br>signaling, platelet aggregation,<br>vasodilatation, nociception, cell death,<br>wound healing, aging, cancer                                                      | 90, 91, 101, 102 (reviews)                                                                                 |

## References

- Porter, J. T. & McCarthy, K. D. Hippocampal astrocytes *in situ* respond to glutamate released from synaptic terminals. *J. Neurosci.* **16**, 5073–5081 (1996).
- Neary, J. T., van Breemen, C., Forster, E., Norenberg, L. O. & Norenberg, M. D. ATP stimulates calcium influx in primary astrocyte cultures. *Biochem. Biophys. Res. Commun.* **157**, 1410–1416 (1988).
- Pearce, B., Murphy, S., Jeremy, J., Morrow, C. & Dandona, P. ATP-evoked Ca<sup>2+</sup> mobilisation and prostanoid release from astrocytes: P<sub>2</sub>-purinergic receptors linked to phosphoinositide hydrolysis. *J. Neurochem.* **52**, 971–977 (1989).
- Kirschuk, S., Moller, T., Voitenko, N., Kettenmann, H. & Verkhratsky, A. ATP-induced cytoplasmic calcium mobilization in Bergmann glial cells. *J. Neurosci.* **15**, 7861–7871 (1995).
- Guthrie, P. B. *et al.* ATP release from astrocytes mediates glial calcium waves. *J. Neurosci.* **19**, 520–528 (1999).
- Cotrina, M. L. *et al.* Connexins regulate calcium signaling by controlling ATP release. *Proc. Natl Acad. Sci. USA* **95**, 15735–15740 (1998).
- Hassinger, T. D. *et al.* An extracellular signaling component in propagation of astrocytic calcium waves. *Proc. Natl Acad. Sci. USA* **93**, 13268–13273 (1996).
- Wang, Z., Haydon, P. G. & Yeung, E. S. Direct observation of calcium-independent intercellular ATP signaling in astrocytes. *Anal. Chem.* **72**, 2001–2007 (2000).

9. Newman, E. A. Propagation of intercellular calcium waves in retinal astrocytes and Müller cells. *J. Neurosci.* **21**, 1–13 (2001).
10. Schipke, C. G., Boucsein, C., Ohlemeyer, C., Kirchhoff, F. & Kettenmann, H. Astrocyte  $\text{Ca}^{2+}$  waves trigger responses in microglial cells in brain slices. *FASEB J.* **16**, 255–257 (2002).
11. Lyons, S. A., Morell, P. & McCarthy, K. D. Schwann cells exhibit  $\text{P}_2\text{Y}$  purinergic receptors that regulate intracellular calcium and are up-regulated by cyclic AMP analogs. *J. Neurochem.* **63**, 552–560 (1994).
12. Mayer, C., Quasthoff, S. & Grafe, P. Differences in the sensitivity to purinergic stimulation of myelinating and non-myelinating Schwann cells in peripheral human and rat nerve. *Glia* **23**, 374–382 (1998).
13. Stevens, B. & Fields, R. D. Action potentials regulate Schwann cell proliferation and development. *Science* **287**, 2267–2271 (2000).
14. Robitaille, R. Purinergic receptors and their activation by endogenous purines at perisynaptic glial cells of the frog neuromuscular junction. *J. Neurosci.* **15**, 7121–7131 (1995).
15. Jahromi, B. S., Robitaille, R. & Charlton, M. P. Transmitter release increases intracellular calcium in perisynaptic Schwann cells *in situ*. *Neuron* **8**, 1069–1077 (1992).
16. Reist, N. E. & Smith, S. J. Neurally evoked calcium transients in terminal Schwann cells at the neuromuscular junction. *Proc. Natl Acad. Sci. USA* **89**, 7625–7629 (1992).
17. Kastriasis, C. H. & McCarthy, K. D. Oligodendroglial lineage cells express neuroligand receptors. *Glia* **8**, 106–113 (1993).
18. Stevens, B. *et al.* Adenosine: a neuron–glial transmitter promoting myelination in the CNS in response to action potentials. *Neuron* **36**, 855–868 (2002).
19. Kriegler, S. & Chiu, S. Y. Calcium signaling of glial cells along mammalian axons. *J. Neurosci.* **13**, 4229–4245 (1993).
20. Toescu, E. C., Moller, T., Kettenmann, H. & Verkhratsky, A. Long-term activation of capacitive  $\text{Ca}^{2+}$  entry in mouse microglial cells. *Neuroscience* **86**, 925–935 (1998).
21. Boucsein, C. *et al.* Purinergic receptors on microglia cells: functional expression in acute brain slices and modulation of microglial activation *in vitro*. *Eur. J. Neurosci.* **17**, 2267–2276 (2003).
22. Light, A. R., Wu, Y., Hughen, R. W. & Guthrie, P. B. Purinergic receptors activating rapid intracellular  $\text{Ca}^{2+}$  increases in microglia. *Neuron Glia Biol.* **2**, 125–138 (2006).
23. Davalos, D. *et al.* ATP mediates rapid microglial response to local brain injury *in vivo*. *Nature Neurosci.* **8**, 752–758 (2005).
24. McLaron, J. G. Purinergic mediated changes in  $\text{Ca}^{2+}$  mobilization and functional responses in microglia; effects of low levels of ATP. *J. Neurosci. Res.* **81**, 349–356 (2005).
25. Holton, F. A. & Holton, P. The capillary dilator substances in dry powders of spinal roots; a possible role of adenosine triphosphate in chemical transmission from nerve endings. *J. Physiol.* **126**, 124–140 (1954).
26. Sawynok, J. *et al.* ATP release from dorsal spinal cord synaptosomes: characterization and neuronal origin. *Brain Res.* **610**, 32–38 (1993).
27. Burnstock, G., Campbell, G., Satchell, D. & Smythe, A. Evidence that adenosine triphosphate or a related nucleotide is the transmitter substance released by non-adrenergic inhibitory nerves in the gut. *Br. J. Pharmacol.* **40**, 668–688 (1970).
28. Burnstock, G. Do some nerve cells release more than one transmitter? *Neuroscience* **1**, 239–248 (1976).
29. Bowser, D. N. & Khakh, B. S. ATP excites interneurons and astrocytes to increase synaptic inhibition in neuronal networks. *J. Neurosci.* **24**, 8606–8620 (2004).
30. Edwards, F. A., Gibb, A. J. & Colquhoun, D. ATP receptor-mediated synaptic currents in the central nervous system. *Nature* **369**, 144–147 (1992).
31. Lopes, L. V., Cunha, R. A., Kull, B., Fredholm, B. B. & Ribeiro, J. A. Adenosine  $\text{A}_{2\text{A}}$  receptor facilitation of hippocampal synaptic transmission is dependent on tonic  $\text{A}_1$  receptor inhibition. *Neuroscience* **112**, 319–329 (2002).

32. Rebola, N. *et al.* Adenosine A<sub>1</sub> and A<sub>2A</sub> receptors are co-expressed in pyramidal neurons and co-localized in glutamatergic nerve terminals of the rat hippocampus. *Neuroscience* **133**, 79–83 (2005).
33. Duner-Engstrom, M. & Fredholm, B. B. Evidence that prejunctional adenosine receptors regulating acetylcholine release from rat hippocampal slices are linked to an N-ethylmaleimide-sensitive G-protein, but not to adenylate cyclase or dihydropyridine-sensitive Ca<sup>2+</sup> channels. *Acta Physiol. Scand.* **134**, 119–126 (1988).
34. Newman, E. A. Calcium increases in retinal glial cells evoked by light-induced neuronal activity. *J. Neurosci.* **25**, 5502–5510 (2005).
35. Newman, E. A. Glial cell inhibition of neurons by release of ATP. *J. Neurosci.* **23**, 1659–1666 (2003).
36. Redman, R. S. & Silinsky, E. M. ATP release together with acetylcholine as the mediator of neuromuscular depression at frog motor nerve endings. *J. Physiol. (Lond.)* **477**, 117–127 (1994).
37. Kolb, H. A. & Wakelam, M. J. Transmitter-like action of ATP on patched membranes of cultured myoblasts and myotubes. *Nature* **303**, 621–623 (1983).
38. Choi, R. C. *et al.* ATP acts via P<sub>2</sub>Y<sub>1</sub> receptors to stimulate acetylcholinesterase and acetylcholine receptor expression: transduction and transcription control. *J. Neurosci.* **23**, 4445–4456 (2003).
39. Rodrigues, R. J., Almeida, T., Richardson, P. J., Oliveira, C. R. & Cunha, R. A. Dual presynaptic control by ATP of glutamate release via facilitatory P<sub>2</sub>X<sub>1</sub>, P<sub>2</sub>X<sub>2/3</sub>, and P<sub>2</sub>X<sub>3</sub> and inhibitory P<sub>2</sub>Y<sub>1</sub>, P<sub>2</sub>Y<sub>2</sub>, and/or P<sub>2</sub>Y<sub>4</sub> receptors in the rat hippocampus. *J. Neurosci.* **25**, 6286–6295 (2005).
40. Almeida, T., Rodrigues, R. J., de Mendonca, A., Ribeiro, J. A. & Cunha, R. A. Purinergic P<sub>2</sub> receptors trigger adenosine release leading to adenosine A<sub>2A</sub> receptor activation and facilitation of long-term potentiation in rat hippocampal slices. *Neuroscience* **122**, 111–121 (2003).
41. Cunha, R. A., Johansson, B., Fredholm, B. B., Ribeiro, J. A. & Sebastiao, A. M. Adenosine A<sub>2A</sub> receptors stimulate acetylcholine release from nerve terminals of the rat hippocampus. *Neurosci. Lett.* **196**, 41–44 (1995).
42. Cunha, R. A. & Ribeiro, J. A. Purinergic modulation of [<sup>3</sup>H]GABA release from rat hippocampal nerve terminals. *Neuropharmacology* **39**, 1156–1167 (2000).
43. Fredholm, B. B. Adenosine A<sub>1</sub>-receptor-mediated inhibition of evoked acetylcholine release in the rat hippocampus does not depend on protein kinase C. *Acta Physiol. Scand.* **140**, 245–255 (1990).
44. Masino, S. A. *et al.* Modulation of hippocampal glutamatergic transmission by ATP is dependent on adenosine A<sub>1</sub> receptors. *J. Pharmacol. Exp. Ther.* **303**, 356–363 (2002).
45. Pascual, O. *et al.* Astrocytic purinergic signaling coordinates synaptic networks. *Science* **310**, 113–116 (2005).
46. Wieraszko, A. & Ehrlich, Y. H. On the role of extracellular ATP in the induction of long-term potentiation in the hippocampus. *J. Neurochem.* **63**, 1731–1738 (1994).
47. Diogenes, M. J., Fernandes, C. C., Sebastiao, A. M. & Ribeiro, J. A. Activation of adenosine A<sub>2A</sub> receptor facilitates brain-derived neurotrophic factor modulation of synaptic transmission in hippocampal slices. *J. Neurosci.* **24**, 2905–2913 (2004).
48. Kukley, M., Schwan, M., Fredholm, B. B. & Dietrich, D. The role of extracellular adenosine in regulating mossy fiber synaptic plasticity. *J. Neurosci.* **25**, 2832–2837 (2005).
49. Zhang, J. M. *et al.* ATP released by astrocytes mediates glutamatergic activity-dependent heterosynaptic suppression. *Neuron* **40**, 971–982 (2003).
50. Gordon, G. R. *et al.* Norepinephrine triggers release of glial ATP to increase postsynaptic efficacy. *Nature Neurosci.* **8**, 1078–1086 (2005).
51. Rochon, D., Rouse, I. & Robitaille, R. Synapse–glia interactions at the mammalian neuromuscular junction. *J. Neurosci.* **21**, 3819–3829 (2001).
52. Robitaille, R. Modulation of synaptic efficacy and synaptic depression by glial cells at the frog neuromuscular junction. *Neuron* **21**, 847–855 (1998).
53. Drury, A. N. & Szent-Györgyi, A. The physiological activity of adenine compounds with special reference to their action upon the mammalian heart. *J. Physiol. (Lond.)* **68**, 213–237 (1929).

54. Burnstock, G. Purinergic nerves. *Pharmacol. Rev.* **24**, 509–581 (1972).
55. Vizi, E. S., Sperlagh, B. & Baranyi, M. Evidence that ATP released from the postsynaptic site by noradrenaline is involved in mechanical response of guinea-pig vas deferens: cascade transmission. *Neuroscience* **50**, 455–465 (1992).
56. Grafstein, B., Liu, S., Cotrina, M. L., Goldman, S. A. & Nedergaard, M. Meningeal cells can communicate with astrocytes by calcium signaling. *Ann. Neurol.* **47**, 18–25 (2000).
57. Chizh, B. A. & Illes, P. P2X receptors and nociception. *Pharmacol. Rev.* **53**, 553–568 (2001).
58. Zonta, M. *et al.* Neuron-to-astrocyte signaling is central to the dynamic control of brain microcirculation. *Nature Neurosci.* **6**, 43–50 (2003).
59. Araque, A., Sanzgiri R. P., Parpura, V. & Haydon, P. G. Calcium elevation in astrocytes causes an NMDA receptor-dependent increase in the frequency of miniature synaptic currents in cultured hippocampal neurons. *J. Neurosci.* **18**, 6822–6829 (1998).
60. Wang, C. M., Chang, Y. Y., Kuo, J. S. & Sun, S. H. Activation of P<sub>2</sub>X<sub>7</sub> receptors induced [<sup>3</sup>H]GABA release from the RBA-2 type-2 astrocyte cell line through a Cl<sup>-</sup>/HCO<sub>3</sub><sup>-</sup>-dependent mechanism. *Glia* **37**, 8–18 (2002).
61. Hide, I. *et al.* Extracellular ATP triggers tumor necrosis factor- $\alpha$  release from rat microglia. *J. Neurochem.* **75**, 965–972 (2000).
62. Ishibashi, T. *et al.* Astrocytes promote myelination in response to electrical impulses. *Neuron* **49**, 823–832 (2006).
63. Neary, J. T., Kang, Y., Willoughby, K. A. & Ellis, E. F. Activation of extracellular signal-regulated kinase by stretch-induced injury in astrocytes involves extracellular ATP and P<sub>2</sub> purinergic receptors. *J. Neurosci.* **23**, 2348–2356 (2003).
64. Kucher, B. M. & Neary, J. T. Bi-functional effects of ATP/P<sub>2</sub> receptor activation on tumor necrosis factor- $\alpha$  release in lipopolysaccharide-stimulated astrocytes. *J. Neurochem.* **92**, 525–535 (2005).
65. Sanz, J. M. & DiVirgilio, F. Kinetics and mechanism of ATP-dependent IL-1  $\beta$  release from microglial cells. *J. Immunol.* **164**, 4893–4898 (2000).
66. Ciccarelli, R. *et al.* Activation of A<sub>1</sub> adenosine or mGlu<sub>3</sub> metabotropic glutamate receptors enhances the release of nerve growth factor and S-100  $\beta$  protein from cultured astrocytes. *Glia* **27**, 275–281 (1999).
67. Lazarowski, E. R., Boucher, R. C. & Harden, T. K. Mechanisms of release of nucleotides and integration of their action as P<sub>2</sub>X- and P<sub>2</sub>Y-receptor activating molecules. *Mol. Pharmacol.* **64**, 785–795 (2003).
68. Maienschein, V., Marxen, M., Volkandt, W. & Zimmermann, H. A plethora of presynaptic proteins associated with ATP-storing organelles in cultured astrocytes. *Glia* **26**, 233–244 (1999).
69. Coco, S. *et al.* Storage and release of ATP from astrocytes in culture. *J. Biol. Chem.* **278**, 1354–1362 (2003).
70. Suadicani, S. O., Brosnan, C. F. & Scemes, E. P2X<sub>7</sub> receptor mediate ATP release and amplification of astrocytic intercellular calcium signaling. *J. Neurosci.* **26**, 1378–1385 (2003).
71. Arcuino, G. *et al.* Intercellular calcium signaling mediated by point-source burst release of ATP. *Proc. Natl Acad. Sci. U S A* **99**, 9840–9845 (2002).
72. Darby, M., Kuzmiski, J. B., Panenka, W., Feighan, D. & MacVicar, B. A. ATP release from astrocytes during swelling activates chloride channels. *J. Neurophysiol.* **89**, 1870–1877 (2003).
73. Cunha, R. A., Vizi, E. S., Ribeiro, J. A. & Sebastiao, A. M. Preferential release of ATP and its extracellular catabolism as a source of adenosine upon high- but not low-frequency stimulation of rat hippocampal slices. *J. Neurochem.* **67**, 2180–2187 (1996).
74. Stevens, B. *et al.* Adenosine: an activity-dependent axonal signal regulating MAP kinase and proliferation in developing Schwann cells. *Neuron Glia Biol.* **1**, 23–34 (2004).
75. Neary, J. T., Whittemore, S. R., Zhu, O. & Norenberg, M. D. Synergistic activation of DNA synthesis in astrocytes by fibroblast growth factors and extracellular ATP. *J. Neurochem.* **63**, 490–494 (1994).
76. Mishra, S. K. Extracellular nucleotide signaling in adult neural stem cells: synergism with growth factor-mediated cellular proliferation. *Development* **133**, 675–684 (2006).

77. Abbracchio, M. P. *et al.* Effects of ATP analogues and basic fibroblast growth factor on astroglial cell differentiation in primary cultures of rat striatum. *Int. J. Dev. Neurosci.* **13**, 685–693 (1995).
78. Arthur, D. B., Akassoglou, K. & Insel, P. A. P<sub>2</sub>Y<sub>2</sub> receptor activates nerve growth factor/TrkA signaling to enhance neuronal differentiation. *Proc. Natl Acad. Sci. USA* **102**, 19138–19143 (2005).
79. Ryten, M., Hoebertz, A. & Burnstock, G. Sequential expression of three receptor subtypes for extracellular ATP in developing rat skeletal muscle. *Dev. Dyn.* **221**, 331–341 (2001).
80. Ryten, M., Dunn, P. M., Neary, J. T. & Burnstock, G. ATP regulates the differentiation of mammalian skeletal muscle by activation of a P<sub>2</sub>X<sub>5</sub> receptor on satellite cells. *J. Cell Biol.* **158**, 345–355 (2002).
81. Kuperman, A. S., Volpert, W. A. & Okamoto, M. Release of adenosine nucleotide from nerve axons. *Nature* **204**, 1000–1001 (1964).
82. Neary, J. T. Trophic actions of extracellular ATP on astrocytes, synergistic interactions with fibroblast growth factors and underlying signal transduction mechanisms. *Ciba Found. Symp.* **198**, 130–139 (1996).
83. Pinto-Duarte, A., Coelho, J. E., Cunha, R. A., Ribeiro, J. A. & Sebastiao, A. M. Adenosine A<sub>2A</sub> receptors control the extracellular levels of adenosine through modulation of nucleoside transporters activity in the rat hippocampus. *J. Neurochem.* **93**, 595–604 (2005).
84. Lee, F. S. & Chao, M. V. Activation of Trk neurotrophin receptors in the absence of neurotrophins. *Proc. Natl Acad. Sci. USA* **98**, 3555–3560 (2001).
85. Abbracchio, M. P. *et al.* *Trophic roles of P<sub>2</sub>-purinoceptors in central nervous system astroglial cells* (eds Chadwick, D. J. and Goode, J.) Ciba Foundation Symposium No. 198, 142–148 (John Wiley and Sons, Chichester, 1996).
86. Stevens, B. *Cross-talk between growth factor and purinergic signaling regulates Schwann cell proliferation* (eds Chadwick, D. J. and Goode, J.) Novartis Symposium Foundation No. 276, 162–180 (2006).
87. Hindley, S., Herman, M. A. & Rathbone, M. P. Stimulation of reactive astrogliosis *in vivo* by extracellular adenosine diphosphate or an adenosine A<sub>2</sub> receptor agonist. *J. Neurosci. Res.* **38**, 399–406 (1994).
88. Brambilla, R., Cottini, L., Fumagalli, M., Ceruti, S. & Abbracchio, M. P. Blockade of A<sub>2A</sub> adenosine receptors prevents basic fibroblast growth factor-induced reactive astrogliosis in rat striatal primary astrocytes. *Glia* **43**, 190–194 (2003).
89. Brambilla, R. *et al.* Identification of a novel P<sub>2</sub> receptor associated with cyclooxygenase-2 induction and reactive astrogliosis. *Drug Dev. Res.* **53**, 148–157 (2001).
90. Burnstock, G. in: *Current Topics in Membranes* Vol. 54 (ed. Schwiebert, E. M.) 307–368 (Academic, San Diego, 2003).
91. Fields, R. D. *Purinergic Signaling in Neuron–Glia Interactions* (eds Chadwick, D. J. and Goode, J.) Novartis Foundation Symposium No. 276 (John Wiley & Sons, New York, 2006).
92. Zimmermann, H. Signalling via ATP in the nervous system. *Trends Neurosci.* **17**, 420–426 (1994).
93. Fowler, J. C., Gervitz, L. M., Hamilton, M. E. & Walker, J. A. Systemic hypoxia and the depression of synaptic transmission in rat hippocampus after carotid artery occlusion. *J. Physiol. (Lond.)* **550**, 961–972 (2003).
94. Tsuda, M. *et al.* P<sub>2</sub>X<sub>4</sub> receptors induced in spinal microglia gate tactile allodynia after nerve injury. *Nature* **424**, 778–783 (2003).
95. Kaya, N., Tanaka, S. & Koike, T. ATP selectively suppresses the synthesis of the inflammatory protein microglial response factor (MRF)-1 through Ca<sup>2+</sup> influx via P<sub>2</sub>X<sub>7</sub> receptors in cultured microglia. *Brain Res.* **952**, 86–97 (2002).
96. Jacobson, K. A. & Gao, Z. G. Adenosine receptors as therapeutic targets. *Nature Rev. Drug Discov.* **5**, 247–264 (2006).
97. Hauser, R. A. & Schwarzschild, M. A. Adenosine A<sub>2A</sub> receptor antagonists for Parkinson's disease: rationale, therapeutic potential and clinical experience. *Drugs Aging* **22**, 471–482 (2005).

98. Parvathenani, L. K. *et al.* P<sub>2</sub>X<sub>7</sub> mediates superoxide production in primary microglia and is up-regulated in a transgenic mouse model of Alzheimer's disease. *J. Biol. Chem.* **278**, 13309–13317 (2003).
99. Malva, J. O., Silva, A. P. & Cunha, R. A. Presynaptic modulation controlling neuronal excitability and epileptogenesis: role of kainate, adenosine and neuropeptide Y receptors. *Neurochem. Res.* **28**, 1501–1515 (2003).
100. Tian, G. F. *et al.* An astrocytic basis of epilepsy. *Nature Med.* **11**, 973–981 (2005).
101. Burnstock, G. *Purinergic Signalling – An Overview* (eds Chadwick, D. J. and Goode, J.) Novartis Foundation Symposium No. 276, 26–53 (John Wiley & Sons, New York, 2006).
102. Burnstock, G. & Knight, G. E. Cellular distribution and functions of P<sub>2</sub> receptor subtypes in different systems. *Int. Rev. Cytol.* **240**, 31–304 (2004).
